# Supplementary material for: Single-Cell Transcriptomics Reveals Spatial and Temporal Turnover of Keratinocyte Differentiation Regulators
Source: PubMed Central journal article supplement (PMC6733986; doi:10.3389/fgene.2019.00775), 2019-09-03
Supplement: DataSheet_1.pdf [file DataSheet_1.pdf]

## Supplementary Figures

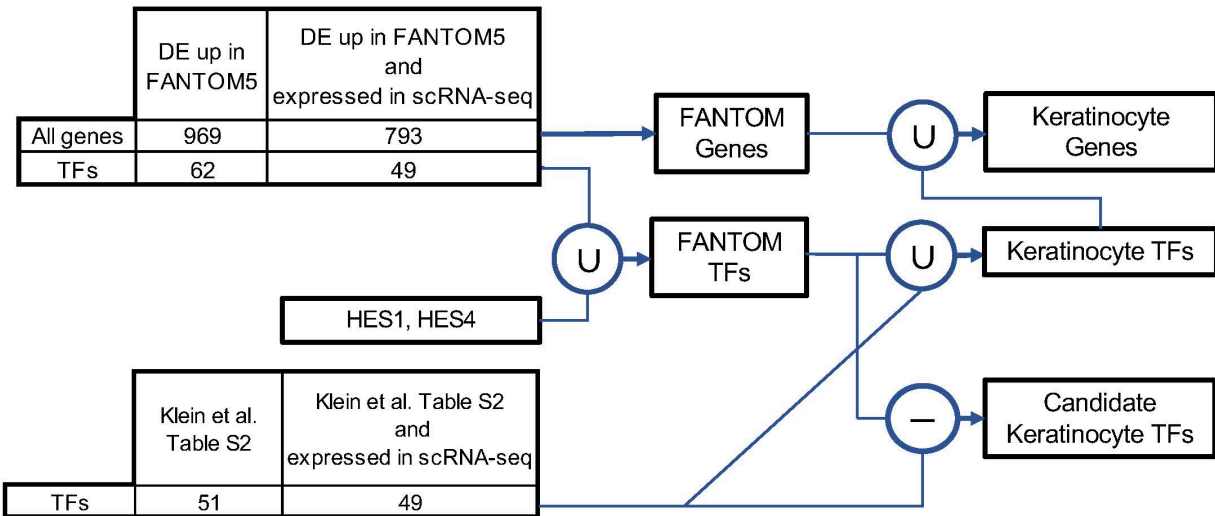

**Figure S1:** Flowchart for selection of TFs and target genes for investigation. Specificity of expression across human primary cells, manual curation and literature were used to construct three sets for downstream analysis: Keratinocyte TFs, Candidate Keratinocyte TFs and Keratinocyte Genes (see Methods: Identification of keratinocyte specific genes and transcription factors).

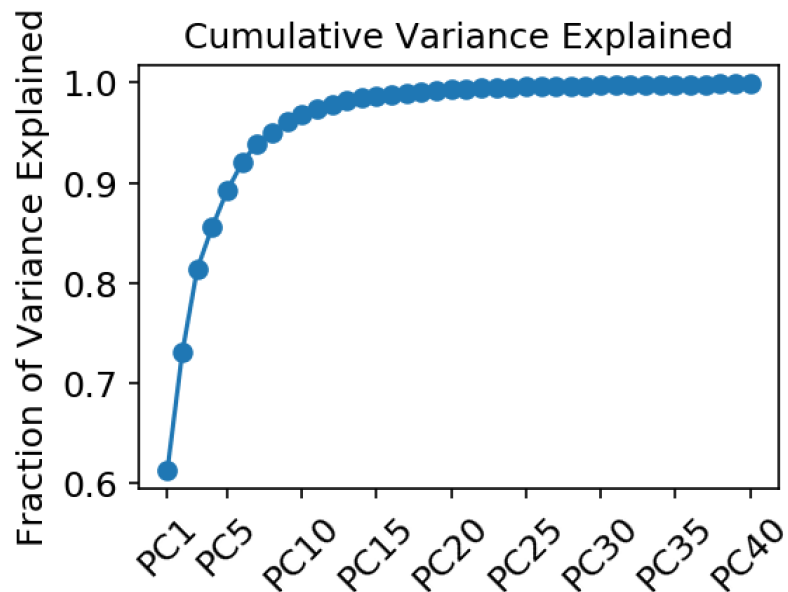

**Figure S2:** Cumulative fraction of variance in log transformed imputed expression explained vs principal component index

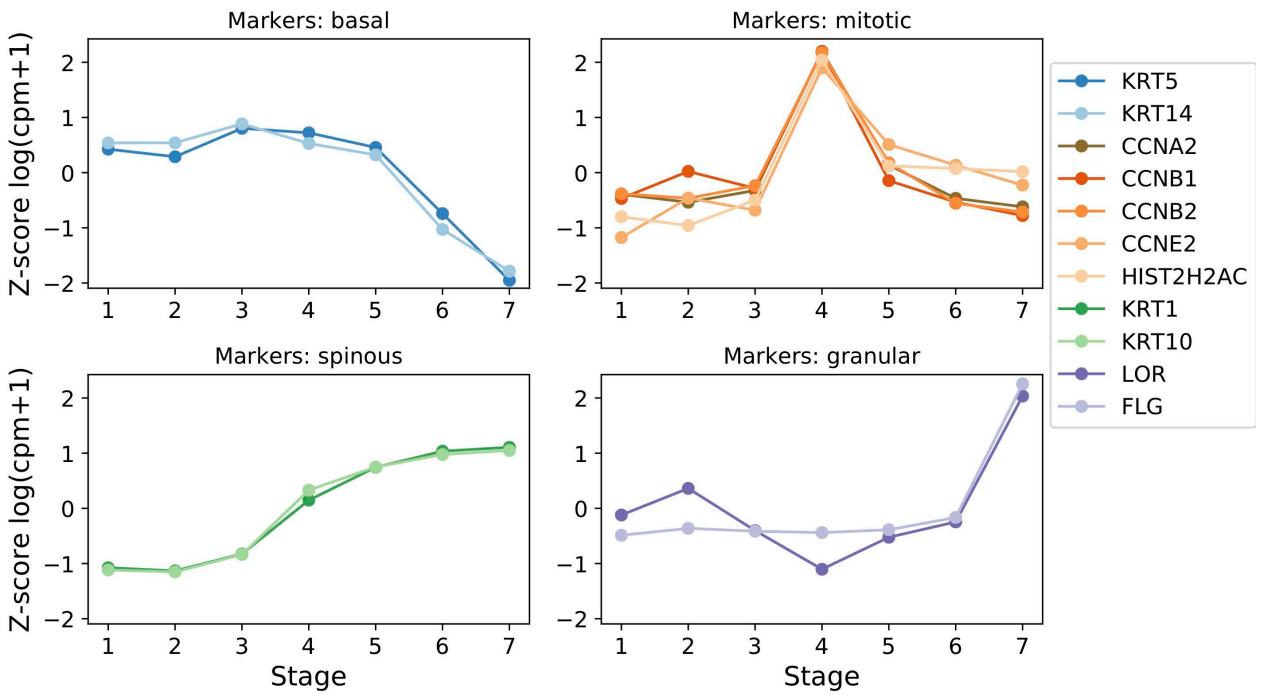

**Figure S3:** Log transformed stage-wise mean imputed expression (standardized across stages 1-7) of marker genes for the basal keratinocytes, mitotic activity, spinous keratinocytes and granular keratinocytes.

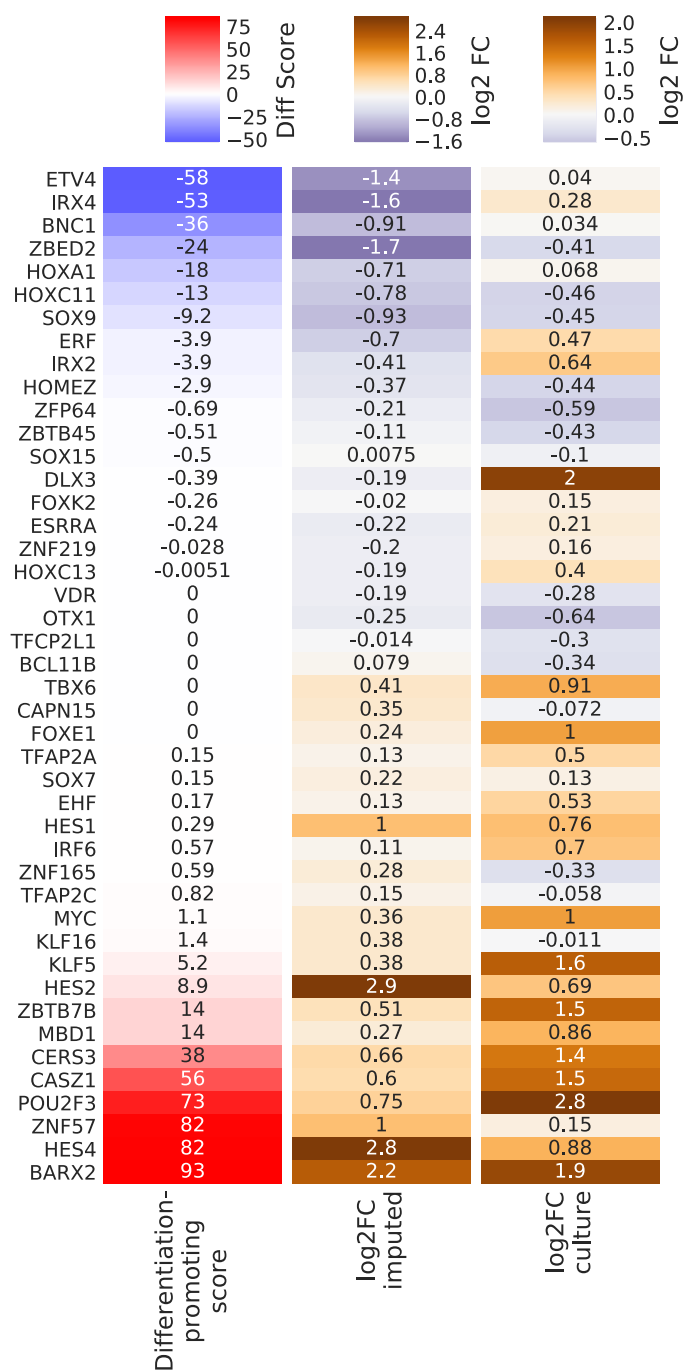

**Figure S4:** Statistics used to prioritize TFs for experimental validation. Differentiation score is assigned to each TF based on summed log-fold change of putative target genes, accounting for the sign of TF-target correlation (Supplementary Methods: Prioritization of knockdown targets). “Log2FC imputed” denotes log2 ratio of average single-cell imputed expression for DK state to average single-cell imputed expression for the BK state. “Log2FC culture” denotes log2 ratio of expression values (FPKM) for keratinocytes cultured in 1.2 mM Ca condition (differentiation promoting) to expression values for keratinocytes cultured in 0.07 mM Ca condition (non-differentiation promoting) (Methods: Expression level of Candidate TFs in cell culture).

(A)

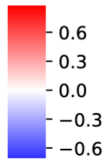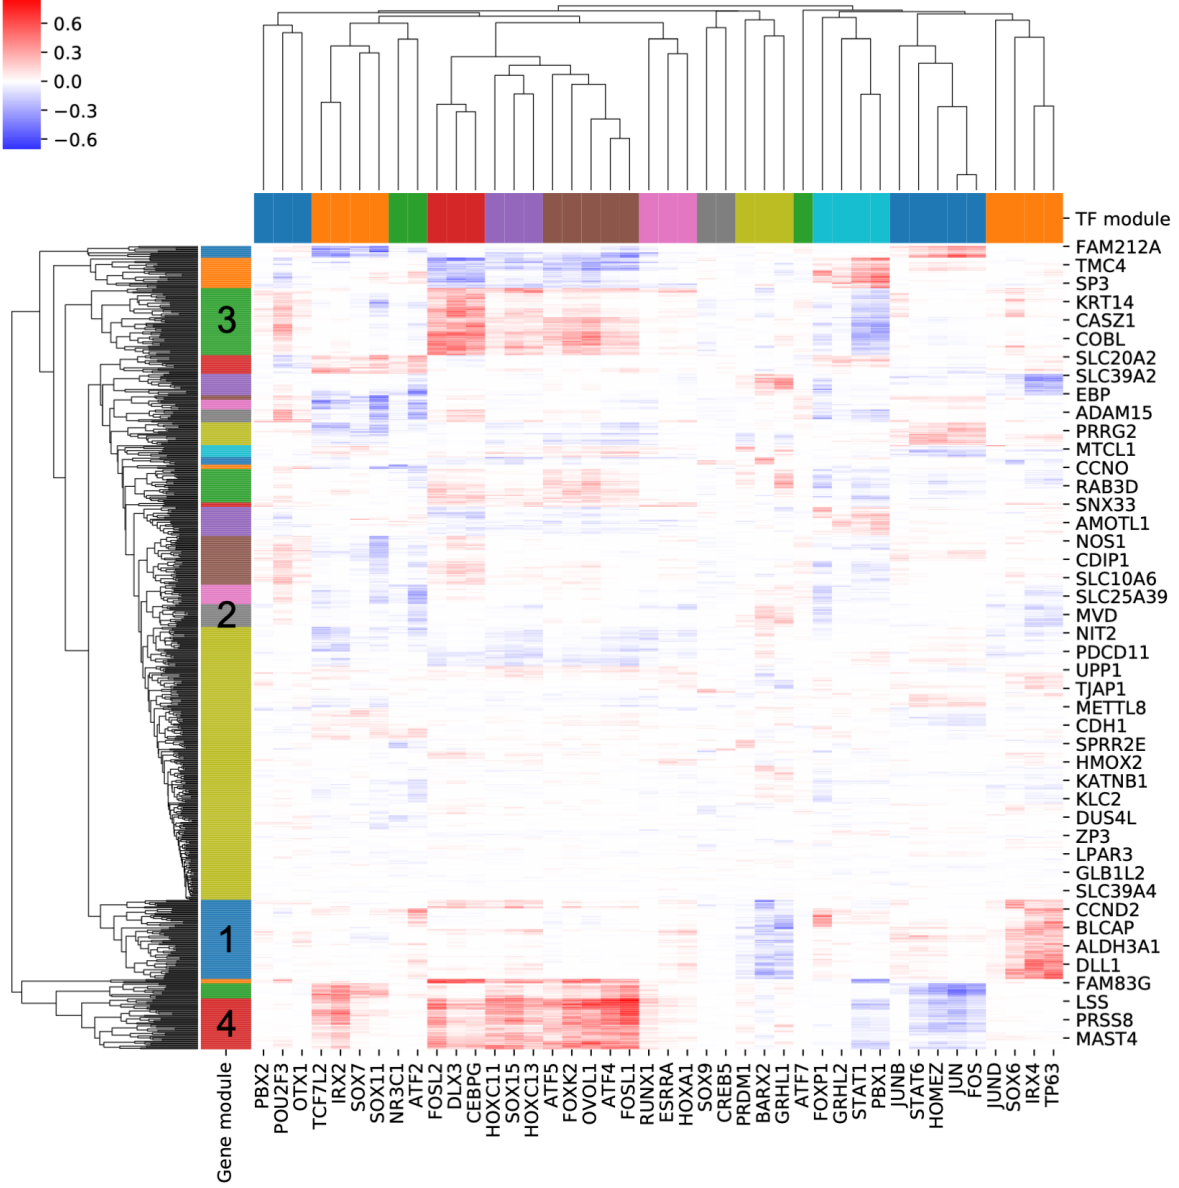

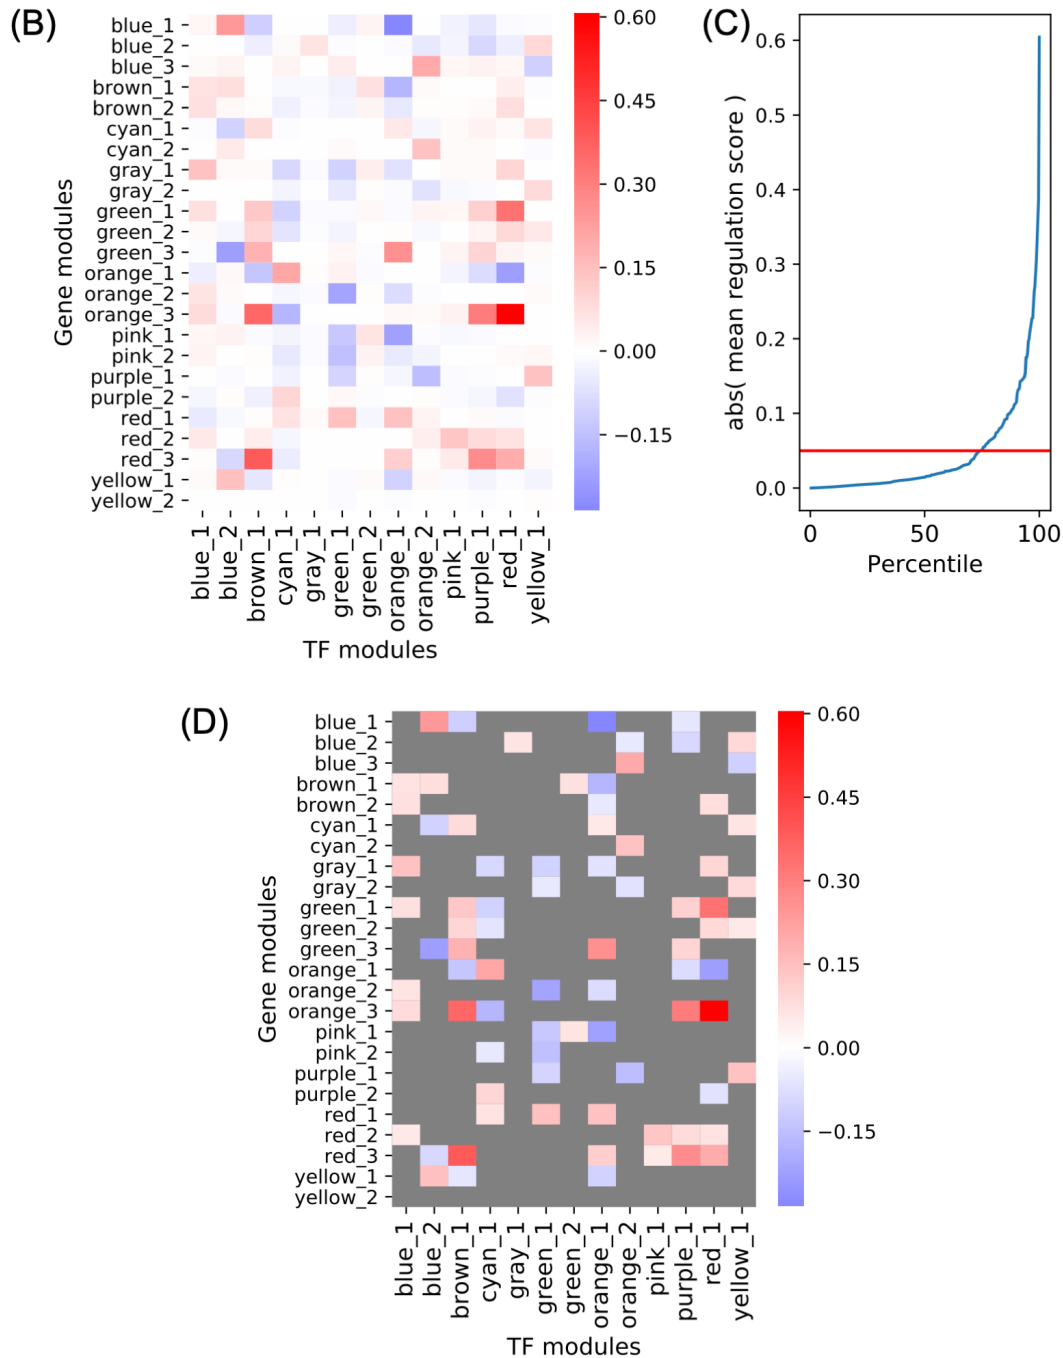

**Figure S5:** Graphical representation of BK network construction . (A) Heatmap of similarity scores between TFs (putative BK regulators) and target genes. Supplementary Methods: Regulatory Network Construction describes clustering of columns into TF modules (identified by colors in first row) and rows into gene modules identified by colors in first column. Numbers in first column correspond to gene modules in figure 3. (B) Heatmap of average TF, target gene similarity scores for pairs of TF and gene modules. (C) Inverse cumulative distribution of absolute value of average similarity scores in (B). Red horizontal line indicates threshold on magnitude of similarity score used to call TF-gene module regulatory relationships. (D) same as (B) but with average similarity scores not passing threshold masked in gray.

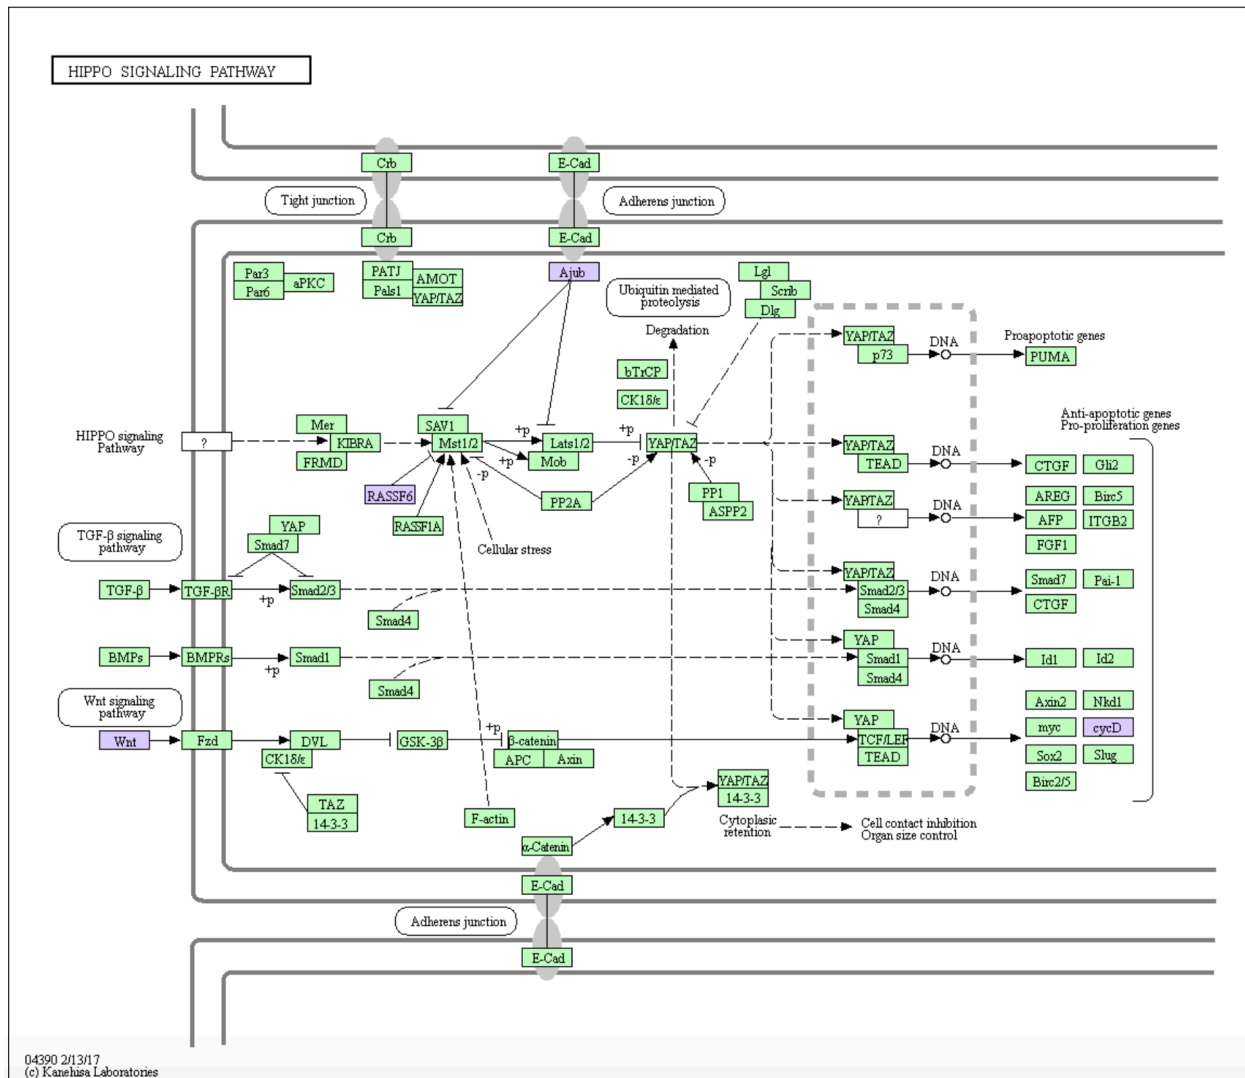

**Figure S6:** Genes corresponding to purple background proteins belong to BK network Gene Module 1. The net effect of AJUBA and RASSF6 is to inhibit phosphorylation of YAP thus allowing nuclear localization. Intracellular signaling downstream of WNT7A, WNT7B and WNT3 promotes activation of pro-proliferative genes by YAP and other TFs (Kanehisa et al., 2017).

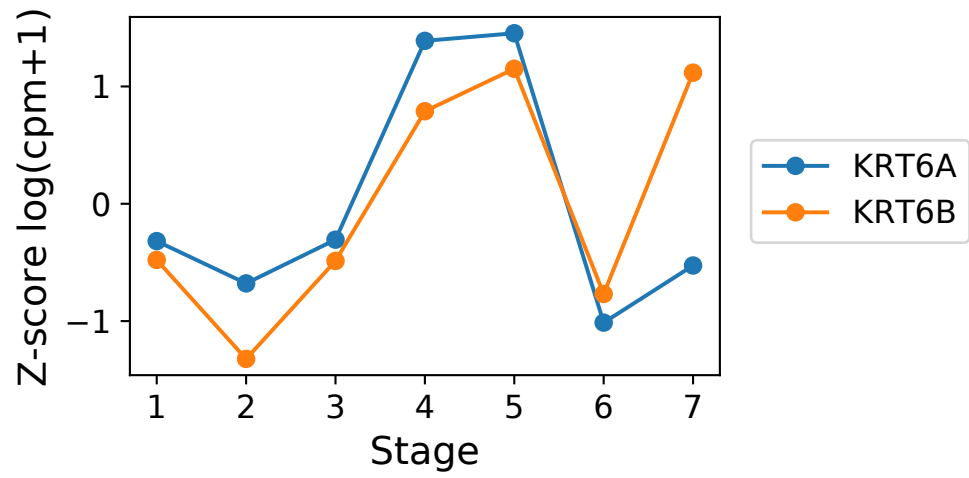

**Figure S7:** Log transformed stage-wise mean imputed expression (standardized across stages 1-7) of KRT6A and KRT6B.

(A)

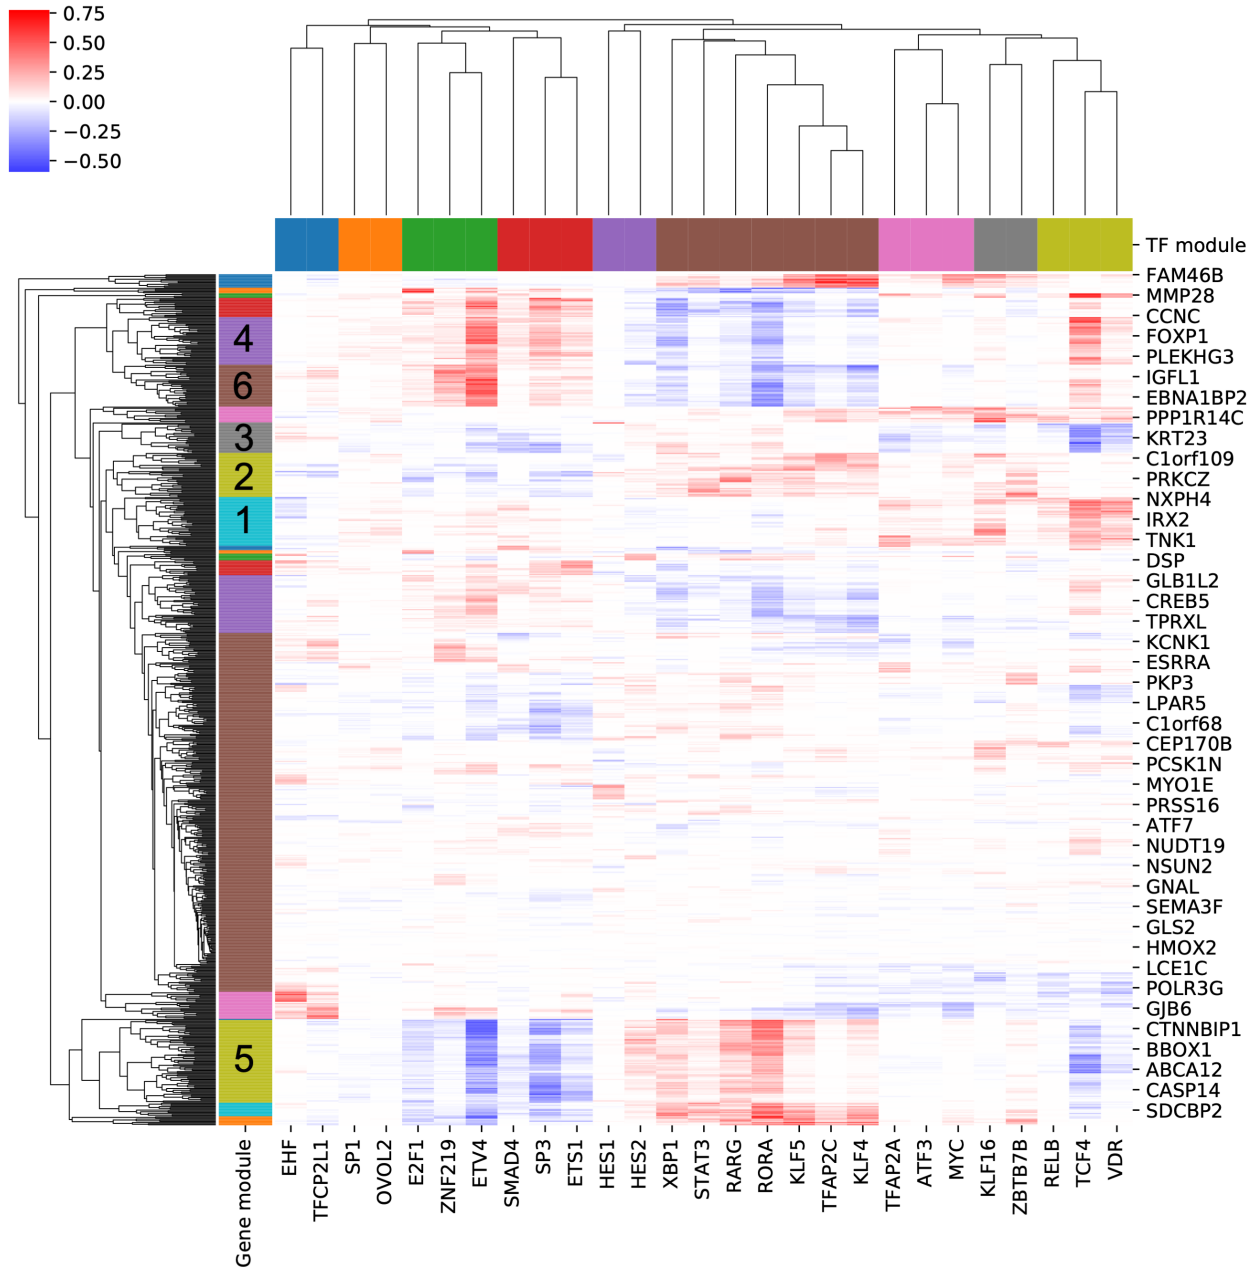



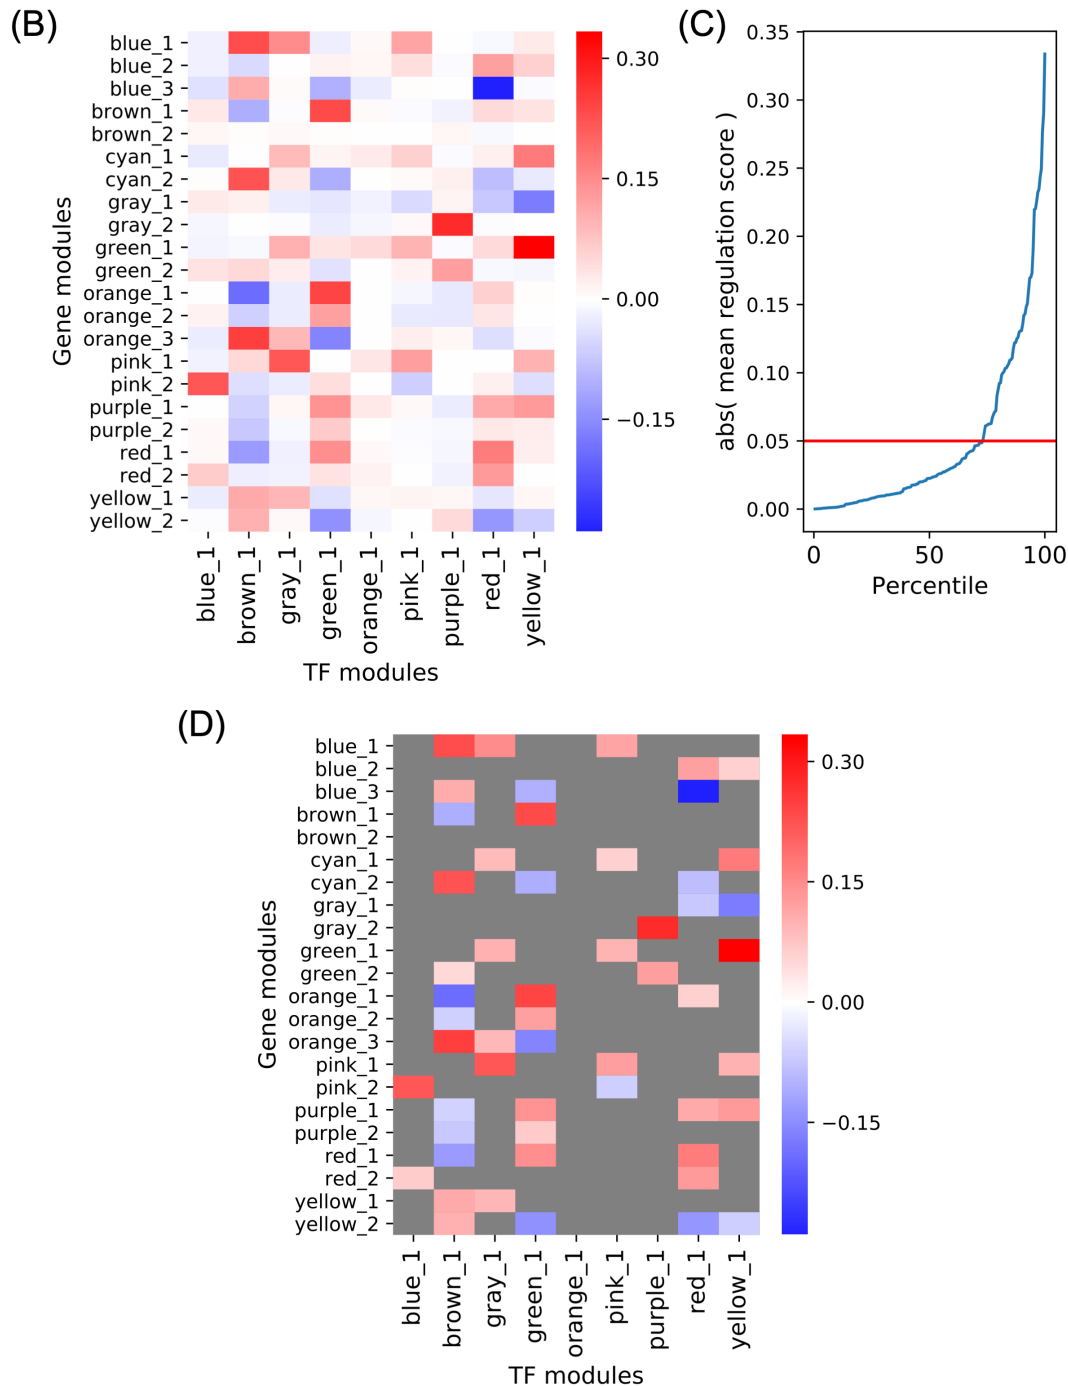

**Figure S8:** Graphical representation of DK network construction. (A) Heatmap of similarity scores between TFs (putative DK regulators) and target genes. Supplementary Methods: Regulatory Network Construction describes clustering of columns into TF modules (identified by colors in first row) and rows into gene modules identified by colors in first column. Numbers in first column correspond to gene modules in figure 4. (B) Heatmap of average TF, target gene similarity scores for pairs of TF and gene modules. (C) Inverse cumulative distribution of absolute value of average similarity scores in (B). Red horizontal line indicates threshold on magnitude of similarity score used to call TF-gene module regulatory relationships. (D) same as (B) but with average similarity scores not passing threshold masked in gray.

(A)

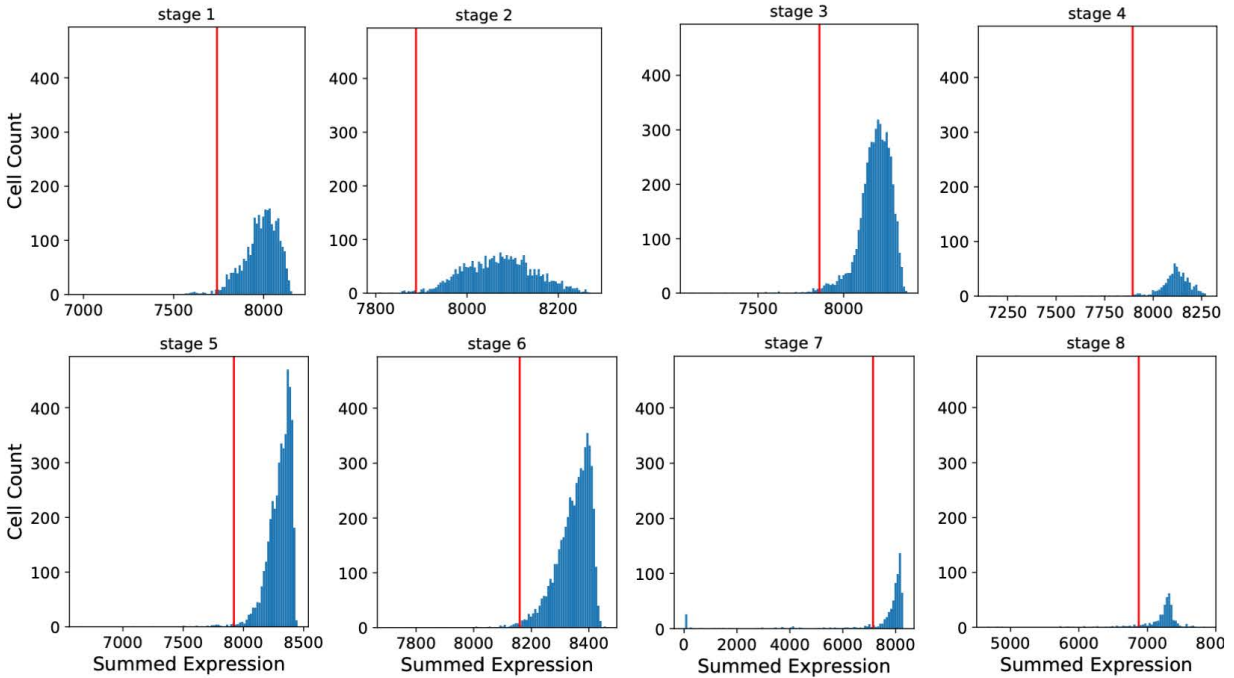

(B)

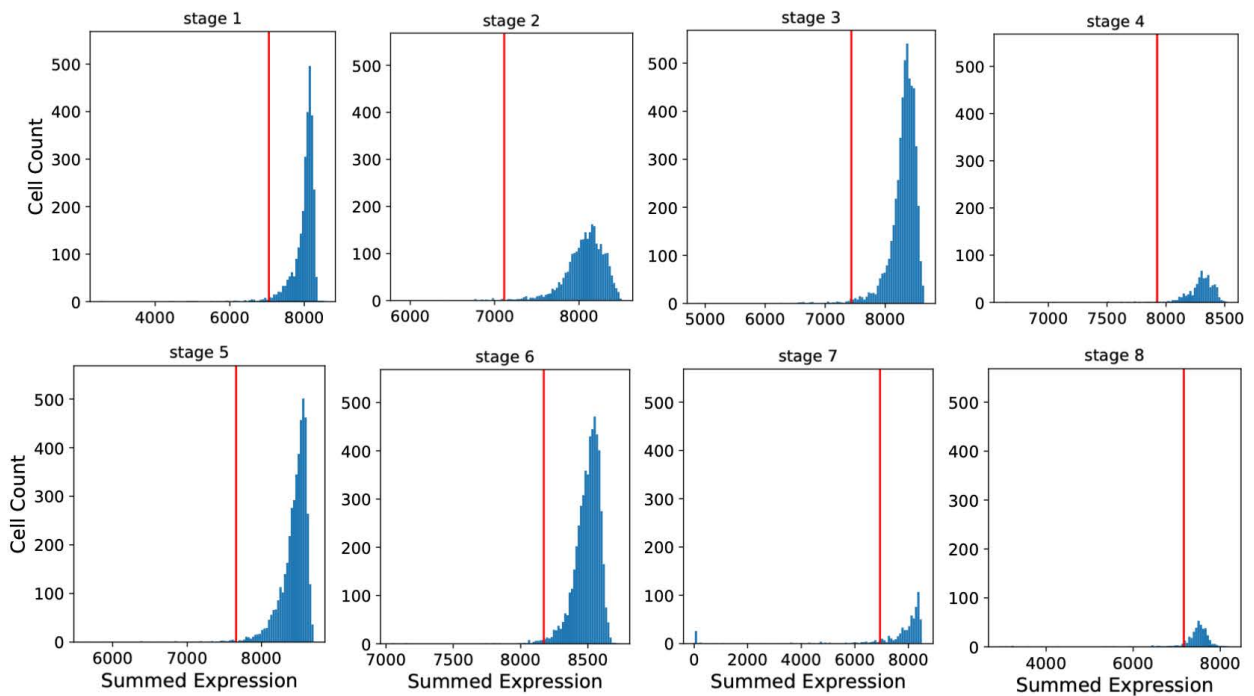

**Figure S9:** (A) Histogram of sum of cell imputed expression values (imputation parameter  $t=10$ ). Summation is over genes expressed (greater than or equal to 1 raw UMI) in at least 1 percent of all keratinocytes and is intended to identify outlier cells with unusually low expression of all typical genes. Red vertical lines indicate thresholds on summed expression; cells with summed expression below threshold were excluded from all analysis downstream of cell clustering. (B) same as for (A) but with imputed expression values calculated using imputation parameter  $t=4$ .

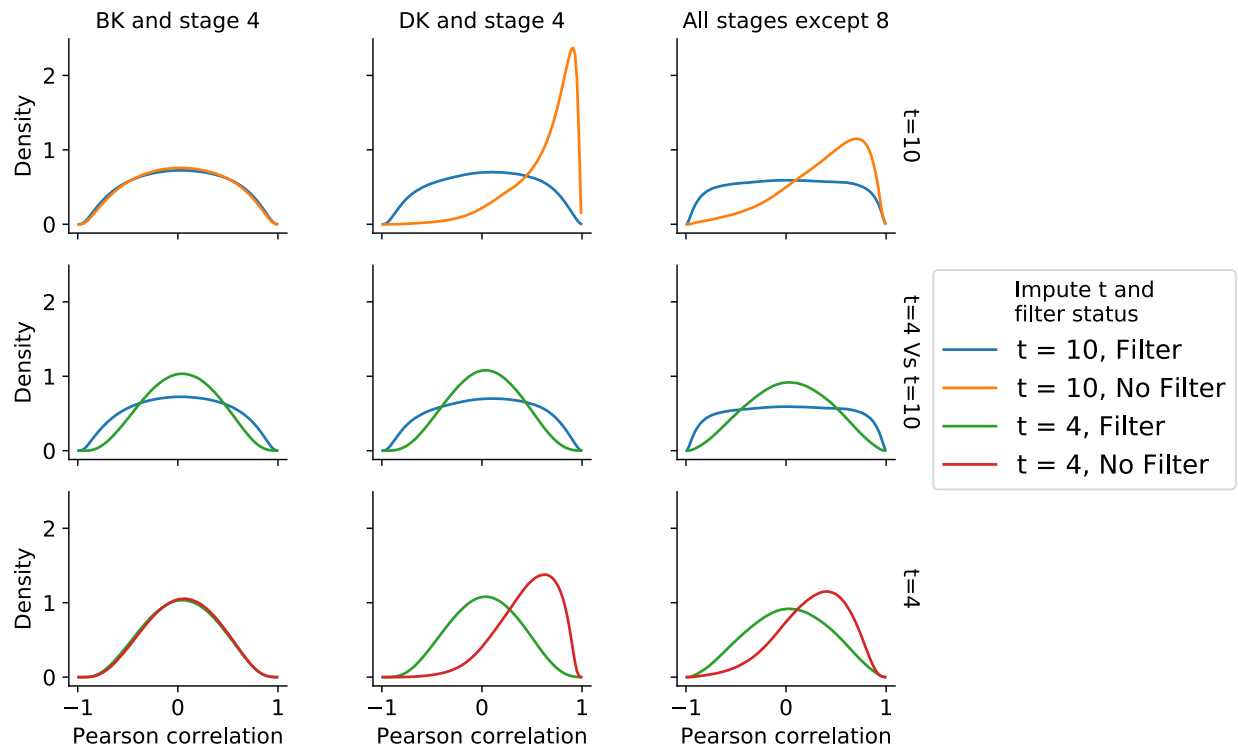

**Figure S10:** Effect of outlier filtering and imputation  $t$  parameter on distribution of pairwise gene correlations. Columns distinguish sets of cells used for calculating correlations: cells in stages stages 1-4 (first column), cells in stages stages 4-7 (second column), cells in stages 1-7 (third column) . Rows compare methods for calculating correlations. The first row shows that filtering of outlier cells prevents skew in distribution of correlations. Second row shows that reducing  $t$  parameter from 10 to 4 narrows the distribution of correlations, potentially reducing false positive regulatory relationships. Third row shows that filtering of outlier cells also prevents skew in distribution of correlations calculated using  $t=4$ .
